# Supplementary material
Source: PubMed Central journal article supplement (PMC5991982)
Supplement: NIHMS926624-supplement-Supp_info.pdf [file NIHMS926624-supplement-Supp_info.pdf]

**Supporting Information Accompanying Manuscript**  
**Transplanting HCV-positive livers into HCV-negative patients with preemptive antiviral treatment: Outcomes of a modeling study**

Jagpreet Chhatwal, PhD,<sup>\*1,2,3</sup> Sumeyye Samur, PhD<sup>\*1,2</sup> Emily D. Bethea, MD<sup>1,2</sup>, Turgay Ayer, PhD,<sup>4</sup> Fasiha Kanwal, MD, MSHS,<sup>7,8</sup> Chin Hur, MD, MPH<sup>1,2,3</sup> Mark S. Roberts, MD, MPP,<sup>5,6</sup> Raymond T. Chung, MD<sup>2,3</sup>

<sup>1</sup>Massachusetts General Hospital Institute for Technology Assessment, Boston, MA

<sup>2</sup>Harvard Medical School, Boston, MA

<sup>3</sup>Liver Center and Gastrointestinal Division, Massachusetts General Hospital, Boston, MA

<sup>4</sup>Department of Industrial and Systems Engineering, Georgia Institute of Technology, Atlanta, GA

<sup>5</sup>Department of Health Policy and Management, University of Pittsburgh Graduate School of Public Health, Pittsburgh, PA

<sup>6</sup>University of Pittsburgh School of Medicine, Pittsburgh, PA

<sup>7</sup>Department of Medicine, Gastroenterology and Hepatology, Baylor College of Medicine, Houston, TX

<sup>8</sup>Houston Veterans Affairs Health Services Research and Development Center of Excellence, Michael E. DeBakey Veterans Affairs Medical Center, Houston, TX

*\*The authors contributed equally to the construction of the manuscript*

**Corresponding author:**

**Jagpreet Chhatwal, PhD**

MGH Institute for Technology Assessment

101 Merrimac Street, Floor 10<sup>th</sup>

Boston, MA 02114

Email: [JagChhatwal@mgh.harvard.edu](mailto:JagChhatwal@mgh.harvard.edu)

Tel: 1-617-724-4445; Fax: 1-617-726-9414

**Table S1. Weekly Liver-related Death Probabilities based on MELD Score**

| <b>MELD Score</b> | <b>Weekly Probability of Liver-related Death</b> |
|-------------------|--------------------------------------------------|
| 6-7               | 0.000014                                         |
| 8-9               | 0.000697                                         |
| 10-11             | 0.000691                                         |
| 12-13             | 0.000022                                         |
| 14-15             | 0.000681                                         |
| 16-17             | 0.000235                                         |
| 18-19             | 0.003659                                         |
| 20-21             | 0.007021                                         |
| 22-23             | 0.009891                                         |
| 24-25             | 0.011323                                         |
| 26-27             | 0.047260                                         |
| 28-29             | 0.078599                                         |
| 30-31             | 0.159678                                         |
| 32-33             | 0.192294                                         |
| 34-35             | 0.211013                                         |
| 36-37             | 0.273120                                         |
| 38-39             | 0.344884                                         |
| 40                | 0.481372                                         |

Source: Alagoz et al. (1) and UNOS data

**Table S2. Weekly Liver Transplantation Probabilities based on MELD Score**

| <b>MELD Score</b> | <b>Weekly Probability of Liver Transplant</b> |
|-------------------|-----------------------------------------------|
| <14               | 0                                             |
| 14–15             | 0.008161                                      |
| 16–17             | 0.012561                                      |
| 18–19             | 0.026286                                      |
| 20–21             | 0.036498                                      |
| 22–23             | 0.052484                                      |
| 24–25             | 0.066997                                      |
| 26–27             | 0.078408                                      |
| 28–29             | 0.082616                                      |
| 30–31             | 0.084809                                      |
| 32–33             | 0.087066                                      |
| 34–35             | 0.084809                                      |
| 36–37             | 0.068787                                      |
| 38–39             | 0.066997                                      |
| 40                | 0.052484                                      |

Source: Massie et al.(2)

**Table S3. Health-Related Quality-of-Life Utilities of the United States Population**

| <b>Age Group</b> | <b>Male</b> | <b>Female</b> |
|------------------|-------------|---------------|
| 20–29            | 0.928       | 0.913         |
| 30–39            | 0.918       | 0.893         |
| 40–49            | 0.887       | 0.863         |
| 50–59            | 0.861       | 0.837         |
| 60–69            | 0.84        | 0.811         |
| 70–79            | 0.802       | 0.771         |
| 80–89            | 0.782       | 0.724         |

Source: Hanmer et al.(3)

## Section S1. Transplant Rate and Mortality by UNOS Region

We used UNOS-reported transplantation and death rates for each region to adjust the probability of receiving an LT and probability of death on the waiting list. Specifically, we estimated the ratio of observed transplant rate of each region and overall rate in the United States. Using the ratio, we estimated region-specific rates as follow:

$$\text{Region-specific-probability} = 1 - (1 - \text{National probability})^{\text{Ratio}}$$

**Table S4. Transplantation and Death Ratios by UNOS Regions**

| Region      | Transplantation<br>(Rate per 100<br>Person Years) | Ratio (Region /<br>U.S.) | Death (Rate per<br>100 Person<br>Years) | Ratio (Region /<br>U.S.) |
|-------------|---------------------------------------------------|--------------------------|-----------------------------------------|--------------------------|
| 1           | 30.5                                              | 0.709                    | 19                                      | 1.061                    |
| 2           | 34                                                | 0.791                    | 18.4                                    | 1.028                    |
| 3           | 110.2                                             | 2.563                    | 20.1                                    | 1.123                    |
| 4           | 29.8                                              | 0.693                    | 15.9                                    | 0.888                    |
| 5           | 28.7                                              | 0.667                    | 16.9                                    | 0.944                    |
| 6           | 50.5                                              | 1.174                    | 21.3                                    | 1.190                    |
| 7           | 47.8                                              | 1.112                    | 19.2                                    | 1.073                    |
| 8           | 37.9                                              | 0.881                    | 16                                      | 0.894                    |
| 9           | 26.4                                              | 0.614                    | 17.2                                    | 0.961                    |
| 10          | 68.8                                              | 1.600                    | 20                                      | 1.117                    |
| 11          | 76.9                                              | 1.788                    | 18.9                                    | 1.056                    |
| <b>U.S.</b> | <b>43.0</b>                                       |                          | <b>17.9</b>                             |                          |

We further accounted for the HCV-positive organ rates to adjust the transplant rate within the region. Specifically, we used the following formula:

$$\text{Adjusted transplant probability} = 1 - (1 - \text{region-specific transplant probability})^{(1 + \text{HCV-positive organ rate})}$$

**Table S5. HCV-positive Organ Rate by UNOS Regions**

| <b>UNOS Region</b> | <b>HCV-positive organ rate</b> |
|--------------------|--------------------------------|
| <b>Region 1</b>    | 0.129                          |
| <b>Region 2</b>    | 0.106                          |
| <b>Region 3</b>    | 0.055                          |
| <b>Region 4</b>    | 0.037                          |
| <b>Region 5</b>    | 0.040                          |
| <b>Region 6</b>    | 0.029                          |
| <b>Region 7</b>    | 0.028                          |
| <b>Region 8</b>    | 0.047                          |
| <b>Region 9</b>    | 0.051                          |
| <b>Region 10</b>   | 0.088                          |
| <b>Region 11</b>   | 0.057                          |
| <b>National</b>    | 0.059                          |

---

Source: UNOS data (4)

## Section S2. Model Validation

We validated the predicted 1-year and 5-year post-LT survival rates with those from Organ Procurement Transplant Network (OPTN) data. Our model-predicted survivals matched perfectly well with the reported data (**Figure S1**).

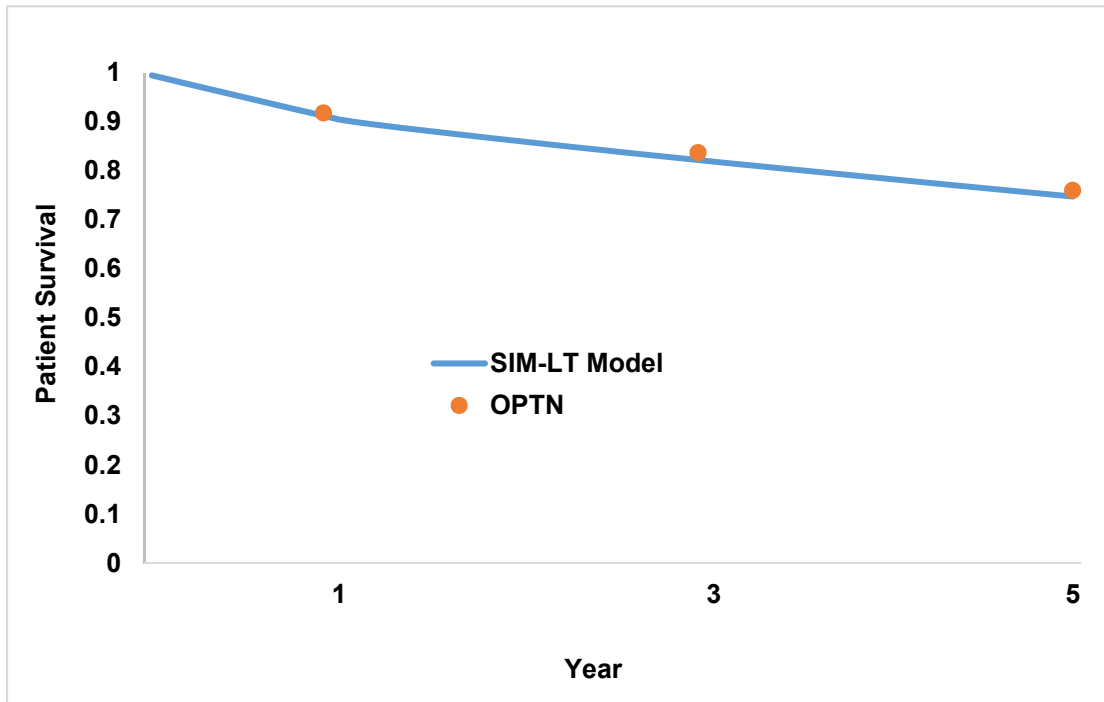

**Figure S1.** Validation of model-predicted post-liver transplant patient survival with the recent OPTN data

*Abbreviations:* OPTN, Organ Procurement Transplant Network; SIM-LT; simulation of liver transplant candidates

### Section S3. Additional Model Outcomes

**Table S6. Expected life years for willing to accept HCV-positive liver versus accepting only HCV-negative livers by MELD score**

| MELD Score | Expected life years                             |                                |
|------------|-------------------------------------------------|--------------------------------|
|            | Accept any liver (HCV-positive or HCV-negative) | Accept only HCV-negative liver |
| 12         | 21.78                                           | 21.80                          |
| 14         | 19.97                                           | 19.99                          |
| 16         | 17.57                                           | 17.61                          |
| 18         | 14.75                                           | 14.77                          |
| 20         | 13.09                                           | 13.05                          |
| 22         | 11.98                                           | 11.89                          |
| 24         | 10.80                                           | 10.67                          |
| 26         | 8.83                                            | 8.67                           |
| 28         | 7.12                                            | 6.95                           |
| 30         | 5.38                                            | 5.21                           |
| 32         | 4.25                                            | 4.10                           |
| 34         | 3.48                                            | 3.34                           |
| 36         | 2.48                                            | 2.37                           |
| 38         | 1.93                                            | 1.85                           |
| 40         | 1.20                                            | 1.13                           |



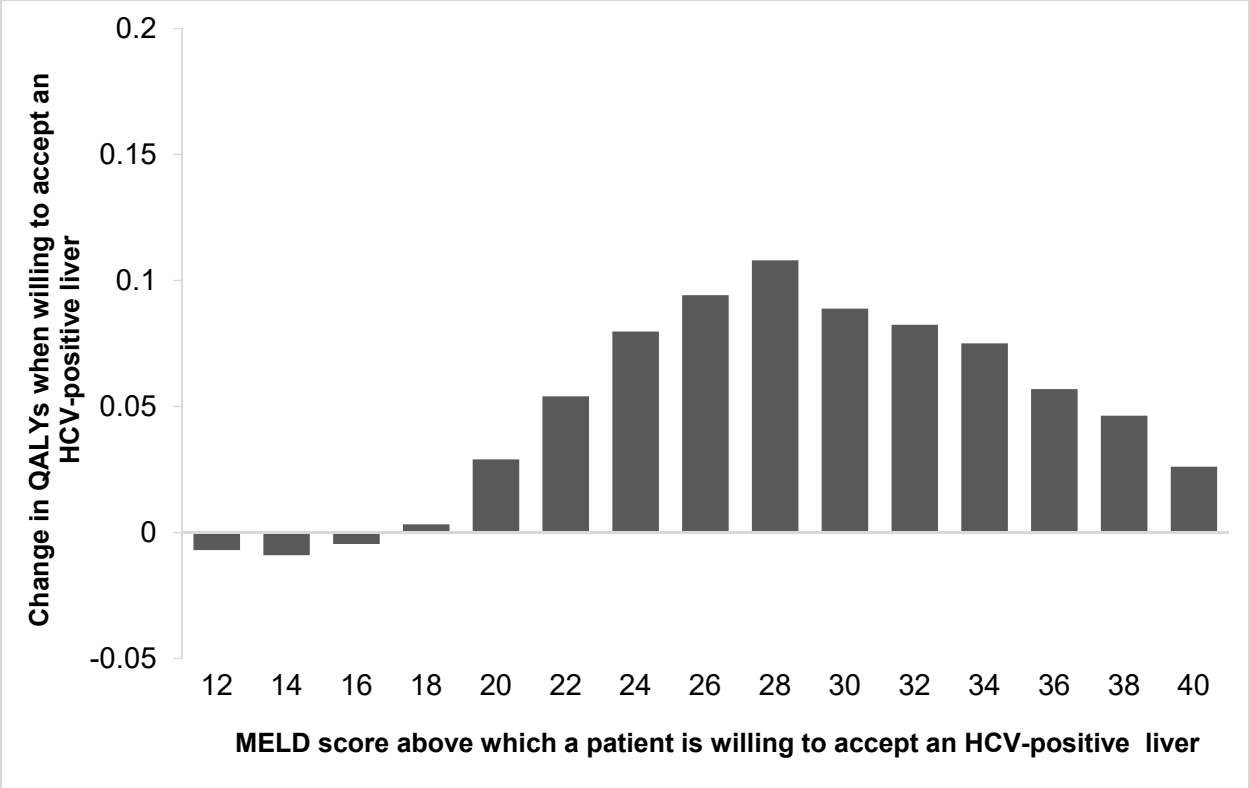

**Figure S2. Change in QALYs if patients accept any liver versus accept only HCV-negative liver on the transplant waiting list. Patients having MELD  $\geq$  20 will benefit from accepting any liver**

*Abbreviations:* MELD, model for end-stage liver disease; HCV, hepatitis C virus; QALY, Quality adjusted life year

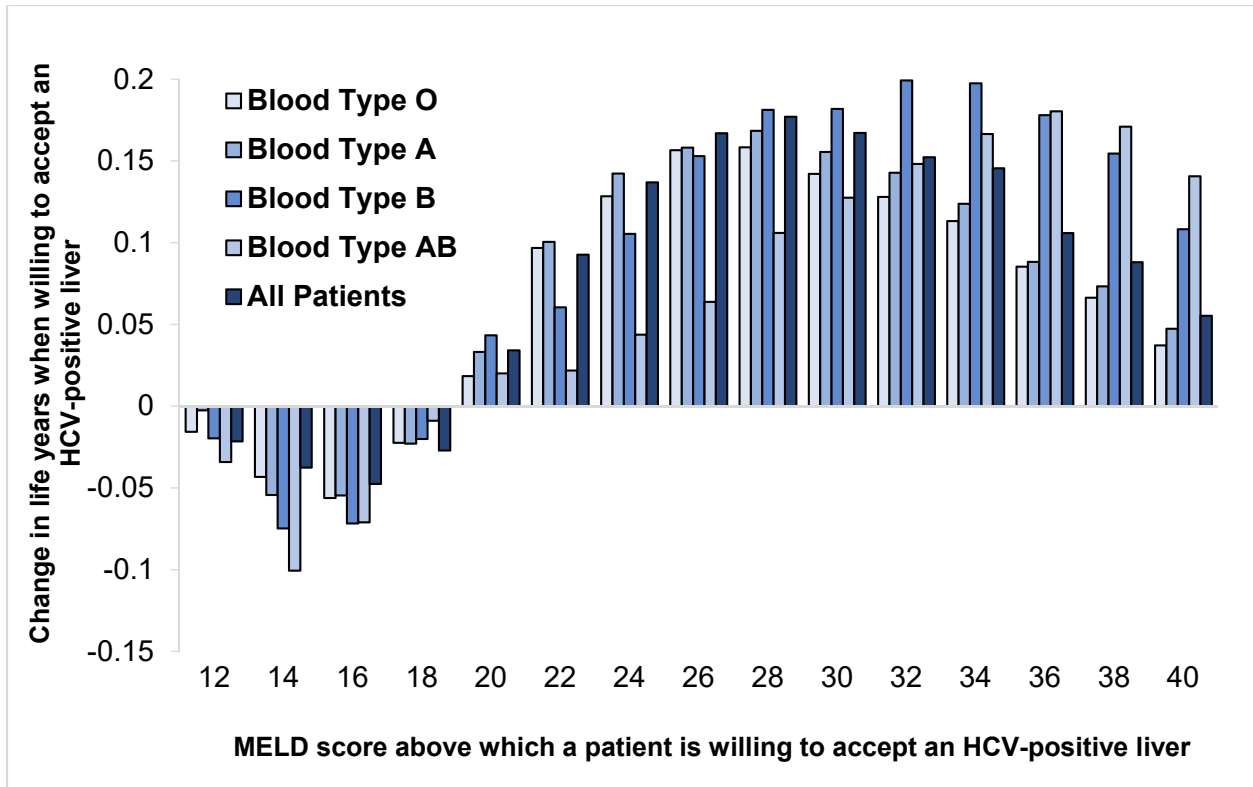

**Figure S3. Change in Life Years if patients accept *any* liver versus accept *only* HCV-negative liver by different blood types.** Patients having MELD  $\geq$  20 will benefit from accepting any liver regardless of the blood type

*Abbreviations:* MELD, model for end-stage liver disease; HCV, hepatitis C virus

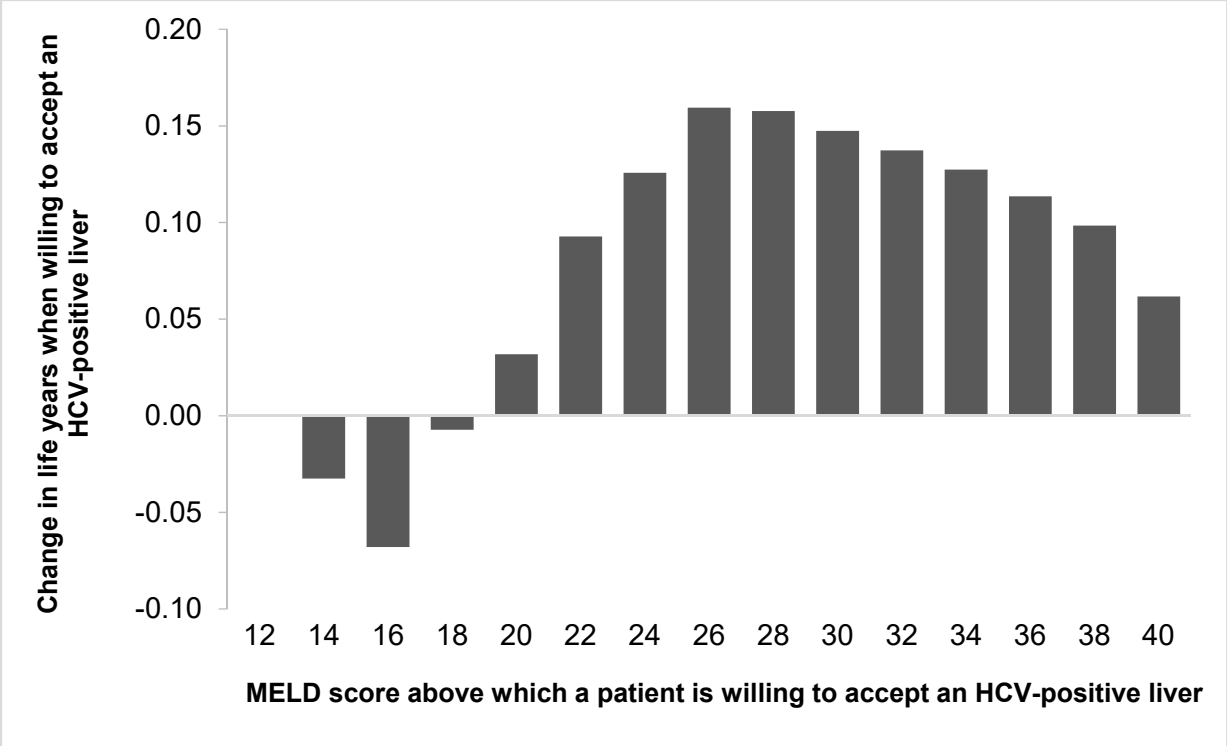

**Figure S4. Change in life years if patients accept *any* liver versus accept *only* HCV-negative liver when Regional Share 35 policy is incorporated.** Though the clinical benefit increased in patients with higher MELD scores, it decreased for lower ones. Overall, it didn't have any impact on the MELD threshold, i.e. patients having MELD  $\geq$  20 would still benefit from accepting any liver.

*Abbreviations:* MELD, model for end-stage liver disease; HCV, hepatitis C virus; QALY, Quality adjusted life year

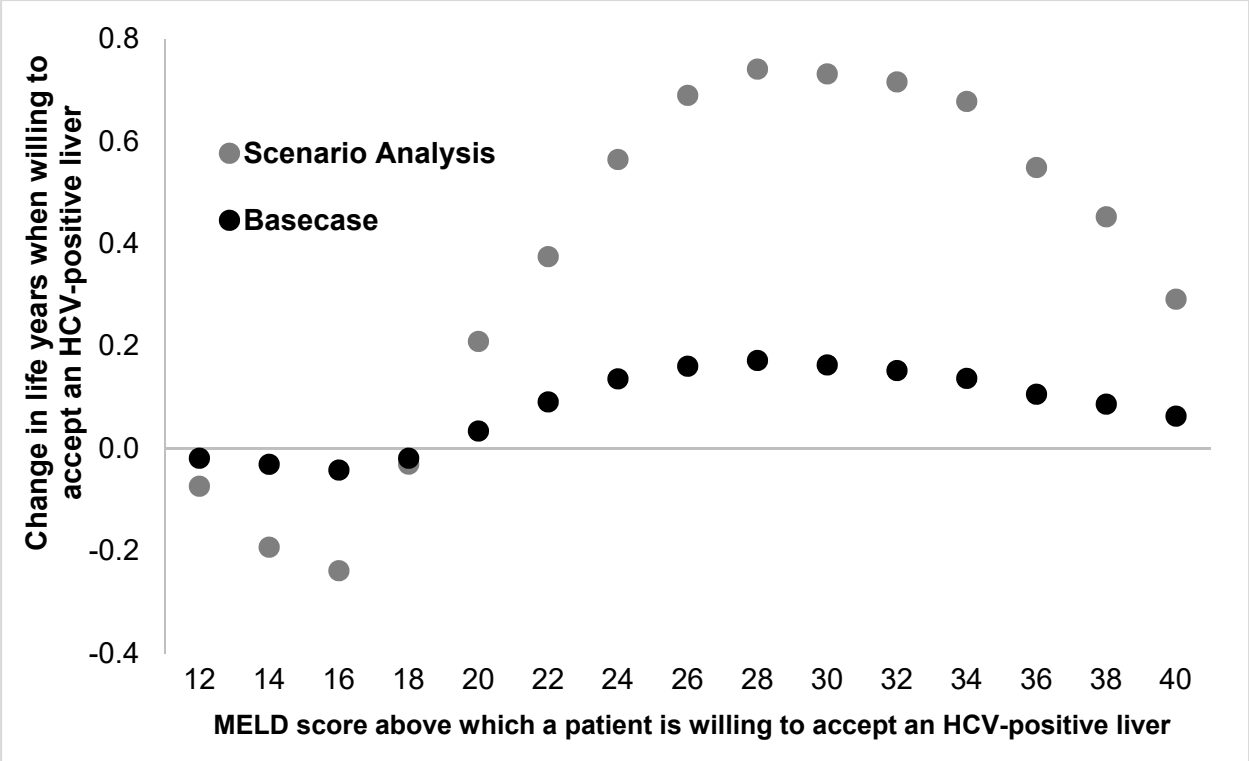

**Figure S5. National results for change in life years if patients accept *any* liver versus accept *only* HCV-negative liver when the HCV-positive organ rate is 26.7%.** Though the clinical benefit increased with the high HCV-positive organ rate, the MELD threshold above which a patient is willing to accept HCV-positive livers remained the same at 20.

*Abbreviations:* MELD, model for end-stage liver disease; HCV, hepatitis C virus

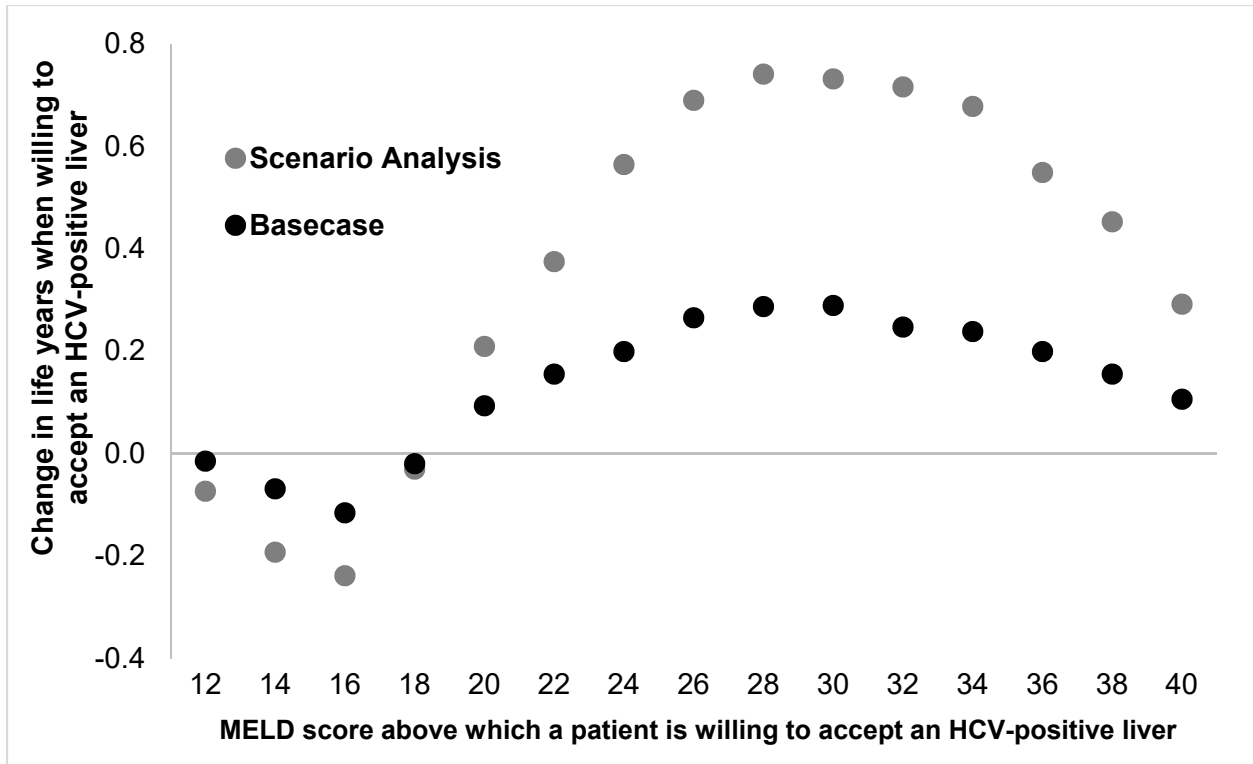

**Figure S6. Region 10 results for change in life years if patients accept *any* liver versus accept *only* HCV-negative liver when the HCV-positive organ rate is 26.7%. Though the clinical benefit increased with the high HCV-positive organ rate, the MELD threshold above which a patient is willing to accept HCV-positive livers remained the same at 20.**

*Abbreviations:* MELD, model for end-stage liver disease; HCV, hepatitis C virus

**Table S7. One-way sensitivity analysis showing model parameters in a decreasing order based on their impact on the primary model outcome at MELD 20**

| Parameter                                                   | Range (Min-Max) | Change in life years when the parameter has its |           |
|-------------------------------------------------------------|-----------------|-------------------------------------------------|-----------|
|                                                             |                 | Min Value                                       | Max Value |
| <b>Base case</b>                                            | -               | <b>0.034</b>                                    |           |
| HCV-positive organ rate                                     | 0.029-0.267     | 0.014                                           | 0.137     |
| Waiting List Mortality *                                    | ±25%            | 0.024                                           | 0.059     |
| Post-LT to LRD (Subs. year) **                              | 0.023-0.038     | 0.058                                           | 0.023     |
| TP: Post-LT Viremic to LRD (Subs. year of 1st LT) ***       | 0.035-0.058     | 0.030                                           | 0.051     |
| TP: Post-LT Viremic to GF (1st year of 1st LT) ***          | 0.079-0.131     | 0.041                                           | 0.022     |
| SVR Rate (Preemptive Therapy)                               | 0.900-0.980     | 0.033                                           | 0.051     |
| TP: Post-LT Viremic to LRD (Subs. year of repeat LT) ***    | 0.040-0.067     | 0.024                                           | 0.040     |
| TP: GF To LT                                                | 0.604-1.000     | 0.035                                           | 0.020     |
| TP: Post-LT Viremic to GF (Subs. year of repeat LT) ***     | 0.044-0.073     | 0.044                                           | 0.029     |
| TP: Post-LT Viremic to GF (1st year of repeat LT) ***       | 0.161-0.268     | 0.048                                           | 0.032     |
| TP: F0-F2 to F3-F4                                          | 0.150-0.250     | 0.027                                           | 0.042     |
| Age                                                         | 35-65           | 0.032                                           | 0.046     |
| TP: Post-LT Viremic to GF (Subs. year of 1st LT)            | 0.038-0.063     | 0.033                                           | 0.046     |
| Waiting List Transplant Probability *                       | ±25%            | 0.021                                           | 0.034     |
| Increased Likelihood of Graft Failure after HCV-positive LT | 1.080-1.800     | 0.042                                           | 0.032     |
| TP: GF to Death                                             | 0.489-0.815     | 0.034                                           | 0.026     |
| TP: Post-LT Viremic to LRD (1st year of 1st LT) ***         | 0.062-0.103     | 0.027                                           | 0.035     |
| Post-LT to LRD (1st year) **                                | 0.056-0.093     | 0.040                                           | 0.035     |
| TP: F3-F4 to GF (1st year)                                  | 0.145-0.242     | 0.034                                           | 0.039     |
| TP: Post-LT Viremic to LRD (1st year of repeat LT) ***      | 0.143-0.238     | 0.031                                           | 0.034     |
| Post-LT to GF **                                            | 0.037-0.062     | 0.035                                           | 0.033     |
| SVR Rate (Salvage Therapy)                                  | 0.900-0.980     | 0.034                                           | 0.034     |

\*Parameters having a value by each MELD score. Basically, we used +/- 25% change from baseline values

\*\*Post-LT corresponds to Post-LT (Non-viremic) and Post-LT (SVR) stages in the model.

\*\*\*Post-LT Viremic correspond to stages including salvage therapy, F0-F2, and F3-F4 in HCV-positive arm in the model

*Abbreviations:* TP: transition probability; LT, Liver transplant; HCV, hepatitis C virus; QoL, quality of life; GF, graft failure; SVR, sustained virologic response; OPTN, Organ Procurement Transplant Network; LRD, liver related death

**Table S8. One-way sensitivity analysis showing model parameters in a decreasing order based on their impact on the primary model outcome at MELD 28**

| Parameter                                                   | Range (Min-Max) | Change in life years when the parameter has its |           |
|-------------------------------------------------------------|-----------------|-------------------------------------------------|-----------|
|                                                             |                 | Min Value                                       | Max Value |
| <b>Base case</b>                                            | -               | <b>0.172</b>                                    |           |
| HCV-positive organ rate                                     | 0.029-0.267     | 0.080                                           | 0.700     |
| Age                                                         | 35-65           | 0.195                                           | 0.120     |
| Waiting List Transplant Probability *                       | ±25%            | 0.153                                           | 0.182     |
| Post-LT to LRD (Subs. year) **                              | 0.023-0.038     | 0.180                                           | 0.153     |
| Post-LT to GF **                                            | 0.037-0.062     | 0.173                                           | 0.161     |
| TP: Post-LT Viremic to GF (1st year of 1st LT) ***          | 0.079-0.131     | 0.161                                           | 0.173     |
| TP: F3-F4 to GF (1st year)                                  | 0.145-0.242     | 0.162                                           | 0.172     |
| TP: Post-LT Viremic to LRD (1st year of 1st LT) ***         | 0.062-0.103     | 0.172                                           | 0.162     |
| TP: Post-LT Viremic to LRD (1st year of Repeat LT) ***      | 0.143-0.238     | 0.164                                           | 0.174     |
| TP: Post-LT Viremic to GF (1st year of Repeat LT) ***       | 0.161-0.268     | 0.172                                           | 0.163     |
| TP: Post-LT Viremic to GF (Subs. year of 1st LT) ***        | 0.038-0.063     | 0.173                                           | 0.164     |
| TP: Post-LT Viremic to GF (Subs. year of Repeat LT) ***     | 0.044-0.073     | 0.171                                           | 0.163     |
| Waiting List Mortality *                                    | ±25%            | 0.166                                           | 0.172     |
| TP: GF to Death                                             | 0.489-0.815     | 0.172                                           | 0.167     |
| TP: Post-LT Viremic to LRD (Subs. year of Repeat LT) ***    | 0.040-0.067     | 0.171                                           | 0.167     |
| TP: GF To LT                                                | 0.603-1.000     | 0.167                                           | 0.171     |
| TP: Post-LT Viremic to LRD (Subs. year of 1st LT) ***       | 0.035-0.058     | 0.168                                           | 0.171     |
| SVR Rate (Preemptive Therapy)                               | 0.900-0.980     | 0.169                                           | 0.171     |
| Post-LT to LRD (1st year) **                                | 0.056-0.093     | 0.171                                           | 0.171     |
| Increased Likelihood of Graft Failure after HCV-positive LT | 1.080-1.800     | 0.170                                           | 0.170     |
| SVR Rate (Salvage Therapy)                                  | 0.900-0.980     | 0.172                                           | 0.172     |
| TP: F0-F2 to F3-F4                                          | 0.150-0.250     | 0.171                                           | 0.171     |

\*Parameters having a value by each MELD score. Basically, we used +/- 25% change from baseline values

\*\*Post-LT corresponds to Post-LT (Non-viremic) and Post-LT (SVR) stages in the model.

\*\*\*Post-LT Viremic correspond to stages including salvage therapy, F0-F2, and F3-F4 in HCV-positive arm in the model

*Abbreviations:* TP: transition probability; LT, Liver transplant; HCV, hepatitis C virus; QoL, quality of life; GF, graft failure; SVR, sustained virologic response; OPTN, Organ Procurement Transplant Network; LRD, liver related death

## REFERENCES

1. Alagoz O, Maillart LM, Schaefer AJ, Roberts MS. The optimal timing of living-donor liver transplantation. *Management Science* 2004;50:1420-1430.
2. Massie AB, Caffo B, Gentry SE, Hall EC, Axelrod DA, Lentine KL, Schnitzler MA, et al. MELD Exceptions and Rates of Waiting List Outcomes. *Am J Transplant* 2011;11:2362-2371.
3. Hanmer J, Lawrence WF, Anderson JP, Kaplan RM, Fryback DG. Report of nationally representative values for the noninstitutionalized US adult population for 7 health-related quality-of-life scores. *Medical Decision Making* 2006;26:391-400.
4. Based on OPTN data as of August 27, 2017. Retrieved from <http://optn.transplant.hrsa.gov>.
